# Supplementary material for: An Exploratory Pathways Analysis of Temporal Changes Induced by Spinal Cord Injury in the Rat Bladder Wall: Insights on Remodeling and Inflammation
Source: PLOS journal article supplement (doi:10.1371/journal.pone.0005852), 2009-06-08
Supplement: S2 (10.1371/journal.pone.0005852.s002) [file journal.pone.0005852.s002]

**Table S2. Focus genes and top functions resulting from the network analysis, per network, at 7 days post-SCI.**

| No. | Up-regulated genes in network                                                                                                        | Down-regulated genes in network                                                                                                                                            | IPKB genes not in data set                                                                                                            | Score | Focus genes | Top functions                                                                                        |
|-----|--------------------------------------------------------------------------------------------------------------------------------------|----------------------------------------------------------------------------------------------------------------------------------------------------------------------------|---------------------------------------------------------------------------------------------------------------------------------------|-------|-------------|------------------------------------------------------------------------------------------------------|
| 1   | CDC20, <b>ELN</b> , ENO1, FABP5, FTS, GREM1, HMGB2*, IGF2R, KRT8, KRT19*, <b>LOX</b> , LYZ, OCLN*, SLC7A1, TGFB1, TGFB3, TPM1, TRPC1 | ANP32A, CALD1, CUGBP2, DDR1, EIF4H, JAG2, PACS1, PDPK1, PGCP, PSMD1, SLC5A5                                                                                                | Ctbp, Fgfr, p70 S6k, Pla2, PP2A, RTK                                                                                                  | 49    | 29          | Embryonic Development, Tissue Morphology, Dermatological Diseases and Conditions                     |
| 2   | A2M, AIF1, APOE, <b>GHR</b> , HK2, IGFBP2*, IL1B, MMP8, PLAT, <b>S100A8</b> , <b>S100A9</b> , TIMP1*, UGCG                           | AGTR1B, APBB1, CYB5R3, <b>DBP*</b> , ENPP2*, FAM105B, IFNGR1, <b>IGFBP3*</b> , KCNH2, LDLR, NR1D1, NR1D2, NR4A3, PPP1R12A, PRLR                                            | Fibrin, Igfbp, IL1, Jak, Mmp, Pdgf, Stat                                                                                              | 47    | 28          | Hematological System Development and Function, Tissue Morphology, Cellular Movement                  |
| 3   | ADCYAP1, AURKB, CCNB1, <b>CD74*</b> , CEBPB, <b>CEBPD</b> , DUSP6, HLA-DRA, MCM6, RB1, SDC1, TOP2A*                                  | ACAT1, CYP11B1, ID2, <b>IL4</b> , ITGA1, KCNC2, LDB3, NR2F1, <b>PRDM2</b> , RALBP1, S100G, SMC1A                                                                           | 14-3-3, Cyclin B, Cyclin E, E2f, Histone h3, MHC Class II, P38 MAPK, PEPCK, Pka, Rb, RNA polymerase II                                | 37    | 24          | Cellular Growth and Proliferation, Skeletal and Muscular System Development and Function, Cell Cycle |
| 4   | BAX*, CA2, CORO1A, FCGR2A*, FDPS, FN1*, KALRN, KLRD1, PTPN6, <b>SERPINE1</b> , SPP1, STAT1, STMN1, TAP1, TFRC                        | ACHE, ACTB, AGTR1, CAP2, GOT2, <b>THRB</b> , WIPF3                                                                                                                         | Actin, Caspase, Cbp/p300, F Actin, Gi-coupled receptor, Hsp70, Jnk, Mapk, MHC Class I, Pak, Rac, Tgf beta, Tnf receptor,              | 33    | 22          | Cell Death, Organismal Injury and Abnormalities, Immunological Disease                               |
| 5   | HCK, <b>IGF1</b> , PTPN11, RASGRP1, SLC2A1, SYK, <b>THY1</b>                                                                         | ATP2A1, ATP2B1, CHRM2, GNAO1, GNAS, GNAZ, GNB5, IRS2, ITPR1, PDE4B, PLCL1, PLN                                                                                             | Adenylate Cyclase, CD3, G alpha, G alphas, G-protein beta, G-protein gamma, Hdac, Irs, Pde, PI3K, Rap1, Ras, SERCA, Sos, TCR, Vav     | 27    | 19          | Cell Signaling, Molecular Transport, Vitamin and Mineral Metabolism                                  |
| 6   | FLT1, HMOX1, MFGE8, SERPINB5                                                                                                         | CENTA1, CYP3A4, GABBR2, GRIN1, GRIN2B, GRIN2C, GRIN2D, GRM7, HD (includes EG:3064), MAG (includes EG:4099), MAP2K5, NEFL (includes EG:4747), NEFM, <b>PLA2G2A</b> , PPAP2B | Akt, Ap1, Calcineurin protein(s), Calmodulin, CaMKII, Cpla2, Creb, Ets, Fgf, GRIN, Hsp90, NMDA Receptor, Pkc(s), PLC gamma, Rsk, Vegf | 27    | 19          | Neurological Disease, Organismal Injury and Abnormalities, Respiratory Disease                       |

<sup>#</sup> Only those networks are depicted that received the highest scores in IPA and that contained relevant genes.

\* Gene is represented in the microarray set with multiple identifiers.

Bold: Gene was analyzed and discussed in more detail
